# Supplementary material
Source: PubMed Central journal article supplement (PMC5912346)
Supplement: NIHMS952467-supplement-8.pdf [file NIHMS952467-supplement-8.pdf]

**Table S1 | Related to Figure 1; Data collection and Model Refinement**

| <b>Data collection</b>                          |              |
|-------------------------------------------------|--------------|
| Particles                                       | 426,107      |
| Pixel size (Å)                                  | 1.00         |
| Defocus range                                   | -1.4 to -2.4 |
| Voltage (kV)                                    | 300          |
| Electron dose (e <sup>-</sup> /Å <sup>2</sup> ) | 45           |
| <b>Refinement</b>                               |              |
| CC map_model                                    | 0.735        |
| <b>Model content</b>                            |              |
| Total number of atoms                           | 10,138       |
| No. of protein chains                           | 1            |
| No. of sugar modifications                      | 8            |
| <b>Model quality</b>                            |              |
| <b>RMSD</b>                                     |              |
| Bond lengths (Å) / Bond angles (°)              | 0.01/0.9     |
| <b>Ramachandran plot statistics</b>             |              |
| Most favored (%)                                | 90.25        |
| Outliers (%)                                    | 0.15         |
| Rotamer outliers (%)                            | 0.81         |
| C-beta deviations                               | 0            |
| Clashscore                                      | 19.75        |
| B_iso <sub>mean</sub>                           | 45.07        |

**Table S2 | Related to Figures 1-2; Structural homologs of TEN2 domains**

| Domain structure (description)                                                                                                                                       | Structural homologs (PDB ID, function)                                                                                                                         |                                                                                                                                                                                                    |                                                                                                                                                       |
|----------------------------------------------------------------------------------------------------------------------------------------------------------------------|----------------------------------------------------------------------------------------------------------------------------------------------------------------|----------------------------------------------------------------------------------------------------------------------------------------------------------------------------------------------------|-------------------------------------------------------------------------------------------------------------------------------------------------------|
| 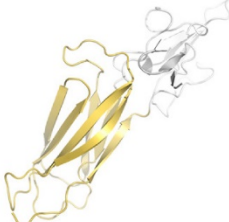 <p><b>ECR2</b> (Ig-like domain)</p>                                                |  <p><b>Monobody (5dc4, light chain Immunoglobulin)</b></p>                    |  <p><b>Furin-P-domain (1p8j, catalytic site stabilization of peptidase activity)</b></p>                         |  <p><b>TcA (4o9y, receptor binding domain D in ABC toxins)</b></p> |
|  <p><b>ECR3</b> (β-propeller)</p>                                                   |  <p><b>Olfactomedin-domain (2rmf, latrophilin3 ECR)</b></p>                   |  <p><b>Monooxygenase (3fvz, Glycine alpha-amidating lyase)</b></p>                                               |  <p><b>TcC (4o9x, TcA binding domain in ABC toxins)</b></p>        |
|  <p><b>ECR4</b> (YD-barrel)</p>                                                    |  <p><b>TOM40 (5o8o, Translocase of the Outer Mitochondrial membrane)</b></p> |  <p><b>TcB-C/Yenb-C (4o9x/4igl, ABC toxin encapsulation core)</b></p> <p>Tcc C (Yen C)</p> <p>Tcd B (Yen B)</p> |                                                                                                                                                       |
|  <p><b>ECR5</b> (TOX-GHH)</p> <p>Furin cleavage site</p> <p>Barrel exit point</p> |  <p><b>HNH endonuclease (5h0m, (tox-HNH), DNase)</b></p>                  |                                                                                                                                                                                                    |                                                                                                                                                       |

TEN2 domains are presented to the left. Domain names and numbers are indicated below the structure. Structural homologs are highlighted to the right. ABC toxin homologs are indicated by a yellow background. Homologs with protease activity, suspected to be involved in TCAP processing, in blue. Additional homologs in green. PDB ID and protein functions are indicated in parenthesis.
